# Supplementary material for: Pyruvate kinase M2 deregulation enhances the metastatic potential of tongue squamous cell carcinoma
Source: PubMed Central journal article supplement (PMC5620253; doi:10.18632/oncotarget.19291), 2017-07-17
Supplement: oncotarget-08-68252-s001.pdf [file oncotarget-08-68252-s001.pdf]

## Pyruvate kinase M2 deregulation enhances the metastatic potential of tongue squamous cell carcinoma

### SUPPLEMENTARY MATERIALS

#### Highlights

1. PKM2 plays an important role in the development and prognosis of TSCC.

2. PKM2 enhances the migration and invasion ability of TSCC cells *in vitro*.

3. PKM2 enhances the proliferation and metastatic potential of TSCC *in vivo*.

4. PKM2 regulates the metastatic potential of TSCC via the C-myc-SOD2-H<sub>2</sub>O<sub>2</sub> pathway.

5. PKM2 regulates the metastatic potential of TSCC via the miR-138-PKM2 pathway.

**Supplementary Table 1: The relationship between PKM2 expression and the clinicopathological characteristics of TSCC patients**

| Characteristic     |                     | PKM2 |      | P value |
|--------------------|---------------------|------|------|---------|
|                    |                     | Low  | High |         |
| Gender             | Male                | 40   | 49   | 0.400   |
|                    | Female              | 18   | 30   |         |
| Age                | ≤40                 | 7    | 11   | 0.751   |
|                    | >40                 | 51   | 68   |         |
| Tumour stage       | T <sub>1+2</sub>    | 49   | 50   | 0.006   |
|                    | T <sub>3+4</sub>    | 9    | 29   |         |
| LN metastasis      | Negative            | 46   | 47   | 0.014   |
|                    | Positive            | 12   | 32   |         |
| Clinical stage     | C <sub>I+II</sub>   | 43   | 37   | 0.001   |
|                    | C <sub>III+IV</sub> | 15   | 42   |         |
| Pathological grade | Well                | 30   | 29   | 0.079   |
|                    | Moderate/Poor       | 28   | 50   |         |

LN: Lymph node.

**Supplementary Table 2: Results of the univariate and multivariate analyses of factors affecting the 5-year overall survival of patients with TSCC**

| Characteristic                                             | Univariate analysis |                | Multivariate analysis |                |
|------------------------------------------------------------|---------------------|----------------|-----------------------|----------------|
|                                                            | <i>P</i> value      | <i>P</i> value | HR                    | 95% CI         |
| Age (>40 vs ≤40)                                           | 0.275               | 0.056          | 2.879                 | (0.974, 8.509) |
| Gender (Female vs Male)                                    | 0.258               | 0.063          | 1.912                 | (0.967, 3.783) |
| Pathological grade (Moderate/<br>Poor vs Well)             | 0.003               | 0.006          | 2.827                 | (1.352, 5.909) |
| Tumour stage (T <sub>1+2</sub> vs T <sub>3+4</sub> )       | 0.001               | 0.012          | 3.360                 | (1.309, 8.628) |
| LN metastasis (Positive vs<br>Negative)                    | 0.022               | 0.044          | 2.086                 | (1.020, 4.266) |
| Clinical stage (C <sub>I+II</sub> vs C <sub>III+IV</sub> ) | 0.007               | 0.539          | 0.734                 | (0.274, 1.967) |
| DM (Positive vs Negative)                                  | 0.519               | 0.309          | 0.565                 | (0.188, 1.696) |
| PKM2 expression (Low vs High)                              | 0.012               | 0.044          | 2.148                 | (1.020, 4.521) |

**Supplementary Table 3: Glycolysis (GO: 0006096)-related gene expression patterns in TSCC cells with different metastatic potentials determined by microarray analysis**

| Gene and Name                                                 | SCC-9                          | UM1                            | UM2/UM1 |
|---------------------------------------------------------------|--------------------------------|--------------------------------|---------|
|                                                               | miR138 mimic/<br>control mimic | miR138 mimic/<br>control mimic |         |
| ADPGKA DP-dependent glucokinase                               | 0.6869                         | 0.6522                         | 0.4922  |
| ALDOA aldolase A, fructose-bisphosphate                       | 0.7322                         | 0.9640                         | 0.8609  |
| HK1 hexokinase 1                                              | 0.3618                         | 0.7103                         | 0.5726  |
| HK2 hexokinase 2                                              | 0.2495                         | 0.5670                         | 0.4955  |
| TPI1 triose phosphate isomerase 1                             | 0.3454                         | 0.7377                         | 0.6186  |
| LDHB lactate dehydrogenase B                                  | 0.8548                         | 0.6770                         | 0.6357  |
| PKM2 pyruvate kinase, muscle                                  | 0.3601                         | 0.6528                         | 0.7956  |
| MDH2 malate dehydrogenase 2, NAD (mitochondrial)              | 0.3386                         | 0.8062                         | 0.6388  |
| DHTKD1 dehydrogenase E1 and transketolase domain containing 1 | 0.2617                         | 0.8891                         | 0.6093  |
| HKDC1 hexokinase domain containing 1                          | 0.7809                         | 0.8024                         | 0.6306  |
| ALDOB aldolase B, fructose-bisphosphate                       | 2.0332                         | 2.8690                         | 1.2333  |
| ALDOC aldolase C, fructose-bisphosphate                       | 1.0501                         | 1.5333                         | 1.0131  |
| ENO2 enolase 2 (gamma, neuronal)                              | 1.0428                         | 1.1432                         | 2.5987  |
| PFKP phosphofructokinase, platelet                            | 1.0719                         | 1.1651                         | 1.1925  |

\*: SCC9 and UM1 cells stably transfected with the miR138 mimic have been shown to have lower migration/invasion abilities than SCC9 and UM1 cells transfected with a control mimic [16].

**Supplementary Table 4: Clinicopathological characteristics of patients with TSCC\***

|                    |                             | TSCC        | Normal     |
|--------------------|-----------------------------|-------------|------------|
| Gender             | Male: n (%)                 | 89 (64.96)  | 11 (55.00) |
|                    | Female: n (%)               | 48 (35.04)  | 9 (45.00)  |
| Age                | Median (range)              | 57 (27–84)  | 52 (37–78) |
| Tumour stage       | T <sub>1+2</sub> : n (%)    | 100 (72.99) |            |
|                    | T <sub>3+4</sub> : n (%)    | 37 (27.01)  |            |
| LN metastasis      | Negative: n (%)             | 93 (67.88)  |            |
|                    | Positive: n (%)             | 44 (32.12)  |            |
| Clinical stage     | C <sub>I+II</sub> : n (%)   | 80 (58.39)  |            |
|                    | C <sub>III+IV</sub> : n (%) | 57 (41.61)  |            |
| Pathological grade | Well: n (%)                 | 59 (43.07)  |            |
|                    | Moderate/Poor: n (%)        | 78 (56.93)  |            |

\*: No distant metastasis was detected. Therefore, M0/M1 data are not available in this study.

Supplementary Table 5: Sequences of the PKM2 siRNA and miR-138

|               | Sequence                      |
|---------------|-------------------------------|
| PKM2 siRNA    | 5'-CCAUAAUCGUCCUCACCAATdT-3'  |
| Control siRNA | 5'-UUCUCCGAACGUGUCACGUTT-3'   |
| Control mimic | 5'-UUCUCCGAACGUGUCACGUTT-3'   |
| miR-138 mimic | 5'-AGCUGGUGUUGUGAAUCAGGCCG-3' |
| Control LNA   | 5'-CAGUACUUUUGUGUAGUACAA-3'   |
| miR-138 LNA   | 5'-CGGCCUGAUUCACAACACCAGCU-3' |

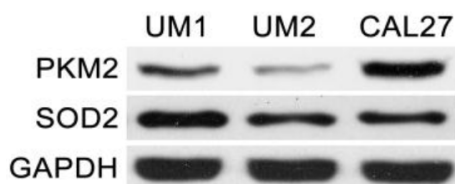

Supplementary Figure 1: Expression levels of PKM2 and SOD2 in TSCC cells with different migratory/invasive potentials as determined by Western blot analysis.

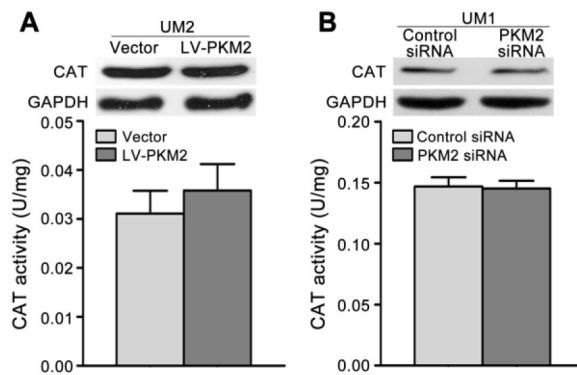

Supplementary Figure 2: Catalase (CAT) expression levels and activity in TSCC cell lines after PKM2 overexpression or knockdown. (A) CAT protein levels and activity did not change after PKM2 overexpression in UM2 cells. (B) CAT protein levels and activity did not change after PKM2 knockdown in UM1 cells. Vector: control lentiviral construct; LV-PKM2: lentiviral construct containing PKM2 cDNA.

**Supplementary File 1.1: Microarray data of UM1 and UM2 cells.**

**See Supplementary File 1**

**Supplementary File 1.2: Microarray data of miR-138 transfected TSCC cells.**

**See Supplementary File 2**
